# Supplementary material
Source: HighWire-hosted journal article supplement (https://bmjopen.bmj.com/content/12/6/e056832)
Supplement: inline-supplementary-material-1 [file inline-supplementary-material-1.pdf]

**Appendix 1.** Results of longitudinal multilevel analysis of physical activity behavior over time in table**Appendix 1.** Results of longitudinal multilevel analysis of physical activity behavior over time

|              | Baseline to T1 |        |         | Baseline to T2  |        |         | Baseline to T3 |                 |         |       |       |                 |
|--------------|----------------|--------|---------|-----------------|--------|---------|----------------|-----------------|---------|-------|-------|-----------------|
|              | $\beta$        | 95% CI | p-value | $\beta$         | 95% CI | p-value | $\beta$        | 95% CI          | p-value |       |       |                 |
| Total PA     | 218.6          | 142.9  | 294.3   | <b>&lt;.001</b> | 242.2  | 162.6   | 321.7          | <b>&lt;.001</b> | 153.8   | 70.9  | 236.6 | <b>&lt;.001</b> |
| Leisure Time | 57.9           | 15.0   | 100.8   | <b>.008</b>     | 19.3   | -25.7   | 64.3           | .400            | 19.8    | -27.2 | 66.7  | .409            |
| Household    | 34.2           | -6.7   | 75.0    | .101            | 44.1   | 1.2     | 86.9           | <b>.044</b>     | -25.5   | -70.1 | 19.0  | .262            |
| Work         | 100.3          | 59.2   | 141.4   | <b>&lt;.001</b> | 151.7  | 108.5   | 195.0          | <b>&lt;.001</b> | 137.6   | 92.6  | 182.5 | <b>&lt;.001</b> |
| Commuting    | 24.5           | 6.1    | 43.0    | <b>.009</b>     | 26.5   | 7.2     | 45.8           | <b>.007</b>     | 24.0    | 3.9   | 44.1  | <b>.019</b>     |
| MVPA         | 105.0          | 57.8   | 152.3   | <b>&lt;.001</b> | 138.4  | 88.7    | 188.1          | <b>&lt;.001</b> | 112.9   | 61.1  | 164.6 | <b>&lt;.001</b> |

PA = Physical activity, MVPA = moderate to vigorous physical activity

Bold = statistically significant
