# Supplementary material
Source: HighWire-hosted journal article supplement (https://bmjopen.bmj.com/content/12/6/e056832)
Supplement: inline-supplementary-material-2 [file inline-supplementary-material-2.pdf]

**Appendix 2.** Descriptive statistics and PA behavior of each diagnosis groups separately.**Brain disease:****Appendix 1.1** Descriptive statistics of participants with a brain disease

|                               | Population at<br>T0 | Population at<br>T1 | Population at<br>T2 | Population at<br>T3 |
|-------------------------------|---------------------|---------------------|---------------------|---------------------|
| N                             | 341                 | 299                 | 256                 | 236                 |
| Age (years)                   | 52.7 ± 12.3         | 53 ± 12.2           | 53.3 ± 11.8         | 53.5 ± 11.9         |
| Sex (% male)                  | 56.6                | 57.9                | 56.6                | 58.9                |
| BMI (kg/m <sup>2</sup> )      | 27 ± 10.7           | 27.1 ± 11.3         | 27 ± 11.9           | 27 ± 12             |
| Smoking                       |                     |                     |                     |                     |
| % Yes                         | 12.6                | 12                  | 10.2                | 11                  |
| % No                          | 73.6                | 77.3                | 78.9                | 78                  |
| Alcohol use                   |                     |                     |                     |                     |
| % No                          | 51                  | 54.2                | 52.3                | 53.8                |
| % Light                       | 12.9                | 13.4                | 14.5                | 14                  |
| % Moderate                    | 20.5                | 19.7                | 20.7                | 19.5                |
| % Excessive                   | 1.5                 | 1.7                 | 1.2                 | 1.3                 |
| Marital status                |                     |                     |                     |                     |
| % Single                      | 23.8                | 25.1                | 25.1                | 25.1                |
| % Married/living with partner | 65.1                | 66.2                | 66.2                | 66.2                |
| Education level               |                     |                     |                     |                     |
| % Low                         | 65.1                | 66.2                | 66                  | 66.9                |
| % High                        | 23.5                | 24.7                | 24.2                | 24.6                |
| Work status                   |                     |                     |                     |                     |
| % School                      | 1.5                 | 1.3                 | 0.8                 | 1.3                 |
| % Employed                    | 36.1                | 37.5                | 35.9                | 37.7                |
| % Unemployed                  | 9.7                 | 10.4                | 9                   | 9.7                 |
| % Retired                     | 17.3                | 18.7                | 18                  | 18.6                |
| % unable to work              | 15.8                | 15.7                | 17.2                | 15.7                |
| % Other                       | 7.3                 | 7.4                 | 9                   | 8.1                 |
| Rehabilitation context        |                     |                     |                     |                     |
| % Rehabilitation center       | 76.2                | 75.6                | 78.1                | 78.8                |
| % Hospital                    | 23.8                | 24.4                | 21.9                | 21.2                |
| Rehabilitation form           |                     |                     |                     |                     |
| % Inpatient                   | 3.8                 | 3.7                 | 3.5                 | 2.5                 |
| % Outpatient                  | 89.7                | 90                  | 88.7                | 90.3                |
| % Consultancy                 | 6.5                 | 6.4                 | 7.8                 | 7.2                 |
| Number of counseling moments  |                     |                     |                     |                     |
| % 0                           | 11.4                | 10.7                | 10.9                | 9.3                 |
| % 1-3                         | 52.5                | 53.5                | 52.3                | 52.1                |
| % 4 or more                   | 36.1                | 35.8                | 36.7                | 38.6                |

Data presented as mean ± SD or %

Note: For some participants information was missing, leading to not all percentages adding up to a 100%.

**Appendix 1.2** Physical activity behavior of people with a brain disease per measurement occasion

|                     | T0                | T1                | T2                | T3                |
|---------------------|-------------------|-------------------|-------------------|-------------------|
| <b>Total PA</b>     |                   |                   |                   |                   |
| N                   | 341               | 299               | 256               | 236               |
| Total (min/week)    | 1410 (760 - 2400) | 1620 (930 - 2685) | 1568 (952 - 2604) | 1680 (960 - 2604) |
| Light (min/week)    | 790 (240 - 1440)  | 840 (308 - 1650)  | 750 (243 - 1642)  | 780 (240 - 1538)  |
| Moderate (min/week) | 160 (0 - 540)     | 180 (30 - 615)    | 195 (1 - 788)     | 230 (3 - 750)     |
| Vigorous (min/week) | 120 (0 - 300)     | 150 (40 - 360)    | 140 (0 - 312)     | 120 (29 - 360)    |

**Leisure time**

|                                                                    |                 |                 |                 |                 |
|--------------------------------------------------------------------|-----------------|-----------------|-----------------|-----------------|
| N                                                                  | 341             | 295             | 256             | 232             |
| Total (min/week)                                                   | 450 (240 - 805) | 520 (288 - 878) | 510 (240 - 840) | 480 (296 - 908) |
| % 0 min/week                                                       | 3.2             | 3.4             | 4.7             | 3               |
| Light (min/week)                                                   | 30 (0 - 250)    | 30 (0 - 270)    | 0 (0 - 246)     | 0 (0 - 240)     |
| % 0 min/week                                                       | 49.9            | 49.2            | 51.2            | 51.3            |
| Moderate (min/week)                                                | 120 (0 - 300)   | 120 (0 - 360)   | 120 (0 - 338)   | 120 (0 - 360)   |
| % 0 min/week                                                       | 33.1            | 28.1            | 31.2            | 32.3            |
| Vigorous (min/week)                                                | 120 (0 - 270)   | 120 (42 - 300)  | 120 (0 - 289)   | 120 (30 - 300)  |
| % 0 min/week                                                       | 27              | 21              | 29.7            | 23.3            |
| Frequency of leisure time activities (mean $\pm$ sd days per week) |                 |                 |                 |                 |
| <i>Walking</i>                                                     | 3.6 $\pm$ 2.7   | 3.3 $\pm$ 2.5   | 3.3 $\pm$ 2.5   | 3.2 $\pm$ 2.6   |
| <i>Bycycling</i>                                                   | 1.8 $\pm$ 2.2   | 1.9 $\pm$ 2.3   | 1.7 $\pm$ 2.2   | 1.9 $\pm$ 2.2   |
| <i>wheelchair riding</i>                                           | 0.2 $\pm$ 1.2   | 0.3 $\pm$ 1.2   | 0.2 $\pm$ 1     | 0.2 $\pm$ 1     |
| <i>Handbiking</i>                                                  | 0 $\pm$ 0       | 0 $\pm$ 0.2     | 0 $\pm$ 0.5     | 0 $\pm$ 0.3     |
| <i>Gardening</i>                                                   | 0.6 $\pm$ 1.1   | 0.6 $\pm$ 1.2   | 0.5 $\pm$ 1.1   | 0.6 $\pm$ 1.1   |
| <i>Odd jobs</i>                                                    | 0.7 $\pm$ 1.4   | 0.6 $\pm$ 1.2   | 0.6 $\pm$ 1.2   | 0.5 $\pm$ 0.9   |
| <i>Fitness</i>                                                     | 0.6 $\pm$ 0.9   | 0.7 $\pm$ 1.2   | 0.6 $\pm$ 1.1   | 0.5 $\pm$ 1.1   |
| <i>Swimming</i>                                                    | 0.3 $\pm$ 0.7   | 0.3 $\pm$ 0.7   | 0.1 $\pm$ 0.5   | 0.1 $\pm$ 0.4   |

**Household**

|                     |                 |                 |                 |                 |
|---------------------|-----------------|-----------------|-----------------|-----------------|
| N                   | 333             | 293             | 253             | 236             |
| Total (min/week)    | 480 (140 - 855) | 420 (150 - 960) | 525 (180 - 870) | 472 (148 - 878) |
| % 0 min/week        | 17.1            | 11.3            | 13              | 13.1            |
| Light (min/week)    | 450 (120 - 840) | 420 (150 - 900) | 450 (180 - 840) | 420 (135 - 840) |
| % 0 min/week        | 17.4            | 12.3            | 14.2            | 14.8            |
| Moderate (min/week) | 0 (0 - 0)       | 0 (0 - 0)       | 0 (0 - 0)       | 0 (0 - 0)       |
| % 0 min/week        | 87.7            | 80.2            | 81              | 80.9            |
| Vigorous (min/week) | 0 (0 - 0)       | 0 (0 - 0)       | 0 (0 - 0)       | 0 (0 - 0)       |
| % 0 min/week        | 100             | 100             | 100             | 100             |

**Work**

|                     |             |             |              |             |
|---------------------|-------------|-------------|--------------|-------------|
| N                   | 321         | 296         | 247          | 231         |
| Total (min/week)    | 0 (0 - 480) | 0 (0 - 900) | 0 (0 - 1020) | 0 (0 - 960) |
| % 0 min/week        | 62.9        | 51.4        | 51           | 55          |
| Light               | 0 (0 - 0)   | 0 (0 - 300) | 0 (0 - 120)  | 0 (0 - 0)   |
| % 0 min/week        | 76.9        | 68.9        | 73.3         | 76.2        |
| Moderate (min/week) | 0 (0 - 0)   | 0 (0 - 60)  | 0 (0 - 120)  | 0 (0 - 90)  |
| % 0 min/week        | 80.4        | 73          | 70.4         | 71.4        |
| Vigorous (min/week) | 0 (0 - 0)   | 0 (0 - 0)   | 0 (0 - 0)    | 0 (0 - 0)   |
| % 0 min/week        | 100         | 100         | 100          | 100         |

**Commuting**

|                     |            |            |            |            |
|---------------------|------------|------------|------------|------------|
| N                   | 340        | 296        | 253        | 231        |
| Total (min/week)    | 0 (0 - 36) | 0 (0 - 30) | 0 (0 - 50) | 0 (0 - 60) |
| % 0 min/week        | 70.3       | 71.6       | 66.8       | 68.4       |
| Light (min/week)    | 0 (0 - 0)  | 0 (0 - 0)  | 0 (0 - 0)  | 0 (0 - 0)  |
| % 0 min/week        | 90.9       | 88.9       | 88.5       | 90.9       |
| Moderate (min/week) | 0 (0 - 0)  | 0 (0 - 0)  | 0 (0 - 0)  | 0 (0 - 0)  |
| % 0 min/week        | 94.4       | 94.3       | 93.3       | 93.5       |
| Vigorous (min/week) | 0 (0 - 0)  | 0 (0 - 0)  | 0 (0 - 0)  | 0 (0 - 0)  |
| % 0 min/week        | 80.6       | 80.7       | 79.1       | 80.5       |

Data presented as median (interquartile range), mean  $\pm$  SD or %

**Musculoskeletal disease****Appendix 1.3 Descriptive statistics of participants with a musculoskeletal disorder**

|                               | Population at T0 | Population at T1 | Population at T2 | Population at T3 |
|-------------------------------|------------------|------------------|------------------|------------------|
| N                             | 234              | 201              | 170              | 149              |
| Age (years)                   | 47 ± 14.9        | 47.5 ± 15        | 47.6 ± 14.8      | 46.4 ± 14.5      |
| Sex (% male)                  | 35.9             | 36.3             | 37.1             | 35.6             |
| BMI (kg/m <sup>2</sup> )      | 27.5 ± 6.1       | 27.2 ± 5.8       | 27.7 ± 6.4       | 27.7 ± 6.2       |
| Smoking                       |                  |                  |                  |                  |
| % Yes                         | 20.5             | 21.9             | 20.6             | 22.1             |
| % No                          | 66.7             | 66.7             | 71.2             | 68.5             |
| Alcohol use                   |                  |                  |                  |                  |
| % No                          | 52.6             | 52.7             | 56.5             | 57               |
| % Light                       | 10.7             | 10.4             | 11.2             | 11.4             |
| % Moderate                    | 22.6             | 24.4             | 22.9             | 21.5             |
| % Excessive                   | 1.3              | 1                | 1.2              | 0.7              |
| Marital status                |                  |                  |                  |                  |
| % Single                      | 26.5             | 25.9             | 25.9             | 25.9             |
| % Married/living with partner | 61.5             | 63.7             | 63.7             | 63.7             |
| Education level               |                  |                  |                  |                  |
| % Low                         | 64.1             | 64.7             | 66.5             | 69.1             |
| % High                        | 24.4             | 25.4             | 26.5             | 22.1             |
| Work status                   |                  |                  |                  |                  |
| % School                      | 2.6              | 3                | 1.8              | 2                |
| % Employed                    | 31.2             | 32.3             | 31.2             | 33.6             |
| % Unemployed                  | 12.8             | 13.9             | 12.9             | 15.4             |
| % Retired                     | 12               | 13.4             | 12.4             | 12.1             |
| % unable to work              | 19.7             | 18.4             | 21.8             | 18.1             |
| % Other                       | 10.7             | 9.5              | 12.4             | 10.7             |
| Rehabilitation context        |                  |                  |                  |                  |
| % Rehabilitation center       | 65.4             | 65.2             | 67.6             | 63.8             |
| % Hospital                    | 34.6             | 34.8             | 32.4             | 36.2             |
| Rehabilitation form           |                  |                  |                  |                  |
| % Inpatient                   | 1.3              | 1.5              | 0.6              | 1.3              |
| % Outpatient                  | 87.2             | 89.1             | 88.2             | 88.6             |
| % Consultancy                 | 11.5             | 9.5              | 11.2             | 10.1             |
| Number of counseling moments  |                  |                  |                  |                  |
| % 0                           | 13.7             | 13.4             | 12.4             | 12.8             |
| % 1-3                         | 62               | 60.2             | 62.9             | 62.4             |
| % 4 or more                   | 24.4             | 26.4             | 24.7             | 24.8             |

Data presented as mean ± SD or %

Note: For some participants information was missing, leading to not all percentages adding up to a 100%.

**Appendix 1.4 Physical activity behavior of participants with a musculoskeletal disorder**

|                     | T0                 | T1                 | T2                 | T3                 |
|---------------------|--------------------|--------------------|--------------------|--------------------|
| <b>Total PA</b>     |                    |                    |                    |                    |
| N                   | 234                | 201                | 170                | 149                |
| Total (min/week)    | 1728 (1042 - 2918) | 2055 (1200 - 3070) | 1935 (1011 - 3270) | 1898 (1085 - 3270) |
| Light (min/week)    | 1140 (450 - 2124)  | 1260 (600 - 2370)  | 1145 (600 - 2248)  | 1050 (555 - 2290)  |
| Moderate (min/week) | 120 (0 - 472)      | 150 (15 - 510)     | 128 (0 - 600)      | 120 (0 - 540)      |
| Vigorous (min/week) | 120 (0 - 268)      | 120 (0 - 310)      | 120 (0 - 300)      | 120 (0 - 300)      |

| <b>Leisure time</b>                                                |                  |                  |                  |                 |
|--------------------------------------------------------------------|------------------|------------------|------------------|-----------------|
| N                                                                  | 233              | 199              | 168              | 145             |
| Total (min/week)                                                   | 420 (243 - 770)  | 450 (252 - 765)  | 420 (204 - 750)  | 375 (185 - 660) |
| % 0 min/week                                                       | 4.3              | 2                | 5.4              | 5.5             |
| Light (min/week)                                                   | 120 (0 - 360)    | 90 (0 - 352)     | 90 (0 - 278)     | 60 (0 - 271)    |
| % 0 min/week                                                       | 38.2             | 35.2             | 39.9             | 40              |
| Moderate (min/week)                                                | 60 (0 - 195)     | 90 (0 - 220)     | 60 (0 - 214)     | 30 (0 - 180)    |
| % 0 min/week                                                       | 42.5             | 32.2             | 42.9             | 48.3            |
| Vigorous (min/week)                                                | 100 (0 - 240)    | 120 (0 - 285)    | 110 (0 - 241)    | 105 (0 - 240)   |
| % 0 min/week                                                       | 27.9             | 28.1             | 29.2             | 36.6            |
| Frequency of leisure time activities (mean $\pm$ sd days per week) |                  |                  |                  |                 |
| Walking                                                            | 3.6 $\pm$ 2.6    | 3.6 $\pm$ 2.4    | 3.4 $\pm$ 2.6    | 3.2 $\pm$ 2.6   |
| Bycycling                                                          | 2.1 $\pm$ 2.3    | 1.8 $\pm$ 2.2    | 1.7 $\pm$ 2.2    | 1.4 $\pm$ 1.9   |
| wheelchair riding                                                  | 0.3 $\pm$ 1.5    | 0.3 $\pm$ 1.3    | 0.2 $\pm$ 1.2    | 0.2 $\pm$ 1.1   |
| Handbiking                                                         | 0.1 $\pm$ 0.5    | 0.1 $\pm$ 0.6    | 0.1 $\pm$ 0.5    | 0 $\pm$ 0.3     |
| Gardening                                                          | 0.5 $\pm$ 1.1    | 0.4 $\pm$ 0.7    | 0.4 $\pm$ 0.8    | 0.3 $\pm$ 0.6   |
| Odd jobs                                                           | 0.5 $\pm$ 1.2    | 0.4 $\pm$ 1.1    | 0.5 $\pm$ 1.1    | 0.4 $\pm$ 1     |
| Fitness                                                            | 0.7 $\pm$ 1.1    | 0.6 $\pm$ 1.1    | 0.5 $\pm$ 1.1    | 0.3 $\pm$ 0.8   |
| Swimming                                                           | 0.4 $\pm$ 0.8    | 0.4 $\pm$ 0.7    | 0.3 $\pm$ 0.7    | 0.2 $\pm$ 0.6   |
| <b>Household</b>                                                   |                  |                  |                  |                 |
| N                                                                  | 232              | 199              | 166              | 147             |
| Total (min/week)                                                   | 630 (236 - 1099) | 630 (300 - 1140) | 600 (278 - 1012) | 585 (248 - 900) |
| % 0 min/week                                                       | 9.5              | 8                | 7.2              | 6.1             |
| Light (min/week)                                                   | 615 (210 - 1080) | 600 (282 - 1140) | 600 (270 - 960)  | 585 (240 - 900) |
| % 0 min/week                                                       | 9.9              | 9                | 7.2              | 6.1             |
| Moderate (min/week)                                                | 0 (0 - 0)        | 0 (0 - 0)        | 0 (0 - 0)        | 0 (0 - 0)       |
| % 0 min/week                                                       | 90.1             | 89.9             | 88               | 90.5            |
| Vigorous (min/week)                                                | 0 (0 - 0)        | 0 (0 - 0)        | 0 (0 - 0)        | 0 (0 - 0)       |
| % 0 min/week                                                       | 100              | 100              | 100              | 100             |
| <b>Work</b>                                                        |                  |                  |                  |                 |
| N                                                                  | 223              | 197              | 166              | 148             |
| Total (min/week)                                                   | 0 (0 - 960)      | 300 (0 - 1200)   | 390 (0 - 1440)   | 360 (0 - 1710)  |
| % 0 min/week                                                       | 50.7             | 44.2             | 41.6             | 42.6            |
| Light                                                              | 0 (0 - 600)      | 0 (0 - 840)      | 0 (0 - 1005)     | 0 (0 - 1200)    |
| % 0 min/week                                                       | 64.6             | 58.4             | 57.2             | 57.4            |
| Moderate (min/week)                                                | 0 (0 - 0)        | 0 (0 - 180)      | 0 (0 - 285)      | 0 (0 - 120)     |
| % 0 min/week                                                       | 77.1             | 68.5             | 64.5             | 70.3            |
| Vigorous (min/week)                                                | 0 (0 - 0)        | 0 (0 - 0)        | 0 (0 - 0)        | 0 (0 - 0)       |
| % 0 min/week                                                       | 100              | 100              | 100              | 100             |
| <b>Commuting</b>                                                   |                  |                  |                  |                 |
| N                                                                  | 232              | 200              | 169              | 149             |
| Total (min/week)                                                   | 0 (0 - 52)       | 0 (0 - 82)       | 0 (0 - 30)       | 0 (0 - 60)      |
| % 0 min/week                                                       | 68.1             | 63.5             | 67.5             | 61.7            |
| Light (min/week)                                                   | 0 (0 - 0)        | 0 (0 - 0)        | 0 (0 - 0)        | 0 (0 - 0)       |
| % 0 min/week                                                       | 87.5             | 80               | 84               | 82.6            |
| Moderate (min/week)                                                | 0 (0 - 0)        | 0 (0 - 0)        | 0 (0 - 0)        | 0 (0 - 0)       |
| % 0 min/week                                                       | 96.6             | 94.5             | 95.3             | 95.3            |
| Vigorous (min/week)                                                | 0 (0 - 0)        | 0 (0 - 0)        | 0 (0 - 0)        | 0 (0 - 0)       |
| % 0 min/week                                                       | 78.9             | 81               | 81.7             | 77.2            |

Data presented as median (interquartile range), mean  $\pm$  SD or %

Chronic painAppendix 1.5 Descriptive statistics of participants with chronic pain

|                               | Population at T0 | Population at T1 | Population at T2 | Population at T3 |
|-------------------------------|------------------|------------------|------------------|------------------|
| N                             | 198              | 176              | 144              | 128              |
| Age (years)                   | 45.4 ± 11.6      | 45.8 ± 11.8      | 47.4 ± 10.8      | 46.6 ± 11.2      |
| Sex (% male)                  | 24.2             | 25.6             | 23.6             | 25               |
| BMI (kg/m <sup>2</sup> )      | 27.9 ± 6.1       | 28 ± 6.2         | 27.8 ± 5.7       | 27.6 ± 5.9       |
| Smoking                       |                  |                  |                  |                  |
| % Yes                         | 16.2             | 17               | 16               | 14.8             |
| % No                          | 70.7             | 72.7             | 73.6             | 76.6             |
| Alcohol use                   |                  |                  |                  |                  |
| % No                          | 51               | 51.1             | 52.8             | 54.7             |
| % Light                       | 8.6              | 9.1              | 7.6              | 9.4              |
| % Moderate                    | 24.7             | 26.7             | 25.7             | 25               |
| % Excessive                   | 2.5              | 2.8              | 3.5              | 2.3              |
| Marital status                |                  |                  |                  |                  |
| % Single                      | 28.3             | 30.7             | 30.7             | 30.7             |
| % Married/living with partner | 59.1             | 59.7             | 59.7             | 59.7             |
| Education level               |                  |                  |                  |                  |
| % Low                         | 72.2             | 73.3             | 74.3             | 76.6             |
| % High                        | 15.7             | 17.6             | 16.7             | 15.6             |
| Work status                   |                  |                  |                  |                  |
| % School                      | 2                | 2.3              | 0.7              | 1.6              |
| % Employed                    | 30.3             | 32.4             | 32.6             | 33.6             |
| % Unemployed                  | 16.2             | 15.3             | 13.2             | 14.1             |
| % Retired                     | 3.5              | 4                | 3.5              | 2.3              |
| % unable to work              | 25.3             | 26.7             | 28.5             | 27.3             |
| % Other                       | 10.1             | 9.7              | 12.5             | 12.5             |
| Rehabilitation context        |                  |                  |                  |                  |
| % Rehabilitation center       | 63.1             | 63.6             | 62.5             | 64.1             |
| % Hospital                    | 36.9             | 36.4             | 37.5             | 35.9             |
| Rehabilitation form           |                  |                  |                  |                  |
| % Inpatient                   | 2.5              | 2.8              | 0.7              | 1.6              |
| % Outpatient                  | 92.4             | 92               | 94.4             | 94.5             |
| % Consultancy                 | 5.1              | 5.1              | 4.9              | 3.9              |
| Number of counseling moments  |                  |                  |                  |                  |
| % 0                           | 9.1              | 8.5              | 7.6              | 3.1              |
| % 1-3                         | 52.5             | 49.4             | 51.4             | 55.5             |
| % 4 or more                   | 38.4             | 42               | 41               | 41.4             |

Data presented as mean ± SD or %

Note: For some participants information was missing, leading to not all percentages adding up to a 100%.

Appendix 1.6 Physical activity behavior of participants with chronic pain

|                     | T0                 | T1                | T2                 | T3                 |
|---------------------|--------------------|-------------------|--------------------|--------------------|
| <b>Total PA</b>     |                    |                   |                    |                    |
| N                   | 198                | 176               | 144                | 128                |
| Total (min/week)    | 1710 (1051 - 2520) | 1845 (972 - 2770) | 1868 (1080 - 2771) | 1598 (1080 - 2771) |
| Light (min/week)    | 1260 (652 - 2032)  | 1338 (630 - 2250) | 1308 (606 - 2280)  | 1192 (770 - 1989)  |
| Moderate (min/week) | 60 (0 - 300)       | 112 (0 - 360)     | 94 (0 - 424)       | 112 (0 - 300)      |
| Vigorous (min/week) | 90 (2 - 210)       | 120 (0 - 240)     | 90 (0 - 240)       | 95 (0 - 240)       |

**Leisure time**

|                                                                    |                 |                 |                 |                 |
|--------------------------------------------------------------------|-----------------|-----------------|-----------------|-----------------|
| N                                                                  | 198             | 171             | 143             | 125             |
| Total (min/week)                                                   | 435 (240 - 735) | 525 (282 - 792) | 445 (240 - 752) | 450 (210 - 710) |
| % 0 min/week                                                       | 1.5             | 0.6             | 3.5             | 3.2             |
| Light (min/week)                                                   | 150 (30 - 420)  | 180 (0 - 480)   | 150 (0 - 360)   | 120 (0 - 360)   |
| % 0 min/week                                                       | 24.2            | 28.1            | 31.5            | 32.8            |
| Moderate (min/week)                                                | 30 (0 - 180)    | 60 (0 - 210)    | 45 (0 - 188)    | 15 (0 - 180)    |
| % 0 min/week                                                       | 46.5            | 40.9            | 44.8            | 48              |
| Vigorous (min/week)                                                | 60 (0 - 191)    | 120 (5 - 210)   | 90 (0 - 180)    | 90 (0 - 225)    |
| % 0 min/week                                                       | 26.3            | 25.1            | 30.1            | 25.6            |
| Frequency of leisure time activities (mean $\pm$ sd days per week) |                 |                 |                 |                 |
| Walking                                                            | 4.5 $\pm$ 2.5   | 4.3 $\pm$ 2.5   | 4.1 $\pm$ 2.6   | 4.1 $\pm$ 2.6   |
| Bycycling                                                          | 2 $\pm$ 2.2     | 1.9 $\pm$ 2.2   | 1.7 $\pm$ 2     | 2.1 $\pm$ 2.2   |
| wheelchair riding                                                  | 0.2 $\pm$ 1.2   | 0.2 $\pm$ 0.8   | 0.2 $\pm$ 1     | 0.2 $\pm$ 1     |
| Handbiking                                                         | 0 $\pm$ 0.5     | 0 $\pm$ 0       | 0 $\pm$ 0.2     | 0 $\pm$ 0.3     |
| Gardening                                                          | 0.6 $\pm$ 1.1   | 0.5 $\pm$ 1.1   | 0.4 $\pm$ 1.1   | 0.6 $\pm$ 1.3   |
| Odd jobs                                                           | 0.8 $\pm$ 1.6   | 0.5 $\pm$ 1.1   | 0.5 $\pm$ 1.1   | 0.3 $\pm$ 0.8   |
| Fitness                                                            | 0.6 $\pm$ 1.1   | 0.6 $\pm$ 1.1   | 0.5 $\pm$ 1     | 0.3 $\pm$ 0.8   |
| Swimming                                                           | 0.3 $\pm$ 0.6   | 0.2 $\pm$ 0.4   | 0.2 $\pm$ 0.5   | 0.2 $\pm$ 0.5   |

**Household**

|                     |                  |                  |                  |                  |
|---------------------|------------------|------------------|------------------|------------------|
| N                   | 196              | 171              | 141              | 128              |
| Total (min/week)    | 690 (270 - 1080) | 720 (300 - 1245) | 680 (315 - 1260) | 702 (300 - 1059) |
| % 0 min/week        | 6.6              | 4.1              | 5                | 7                |
| Light (min/week)    | 690 (270 - 1058) | 660 (300 - 1245) | 680 (300 - 1260) | 702 (300 - 1050) |
| % 0 min/week        | 6.6              | 4.7              | 5.7              | 7                |
| Moderate (min/week) | 0 (0 - 0)        | 0 (0 - 0)        | 0 (0 - 0)        | 0 (0 - 0)        |
| % 0 min/week        | 92.9             | 91.8             | 90.1             | 89.1             |
| Vigorous (min/week) | 0 (0 - 0)        | 0 (0 - 0)        | 0 (0 - 0)        | 0 (0 - 0)        |
| % 0 min/week        | 100              | 100              | 100              | 100              |

**Work**

|                     |             |             |             |             |
|---------------------|-------------|-------------|-------------|-------------|
| N                   | 190         | 175         | 141         | 126         |
| Total (min/week)    | 0 (0 - 720) | 0 (0 - 900) | 0 (0 - 960) | 0 (0 - 930) |
| % 0 min/week        | 55.3        | 52.6        | 53.2        | 55.6        |
| Light               | 0 (0 - 480) | 0 (0 - 600) | 0 (0 - 540) | 0 (0 - 480) |
| % 0 min/week        | 62.6        | 60.6        | 63.1        | 63.5        |
| Moderate (min/week) | 0 (0 - 0)   | 0 (0 - 30)  | 0 (0 - 0)   | 0 (0 - 0)   |
| % 0 min/week        | 83.7        | 74.9        | 75.2        | 77          |
| Vigorous (min/week) | 0 (0 - 0)   | 0 (0 - 0)   | 0 (0 - 0)   | 0 (0 - 0)   |
| % 0 min/week        | 100         | 100         | 100         | 100         |

**Commuting**

|                     |            |            |            |           |
|---------------------|------------|------------|------------|-----------|
| N                   | 197        | 174        | 143        | 127       |
| Total (min/week)    | 0 (0 - 50) | 0 (0 - 40) | 0 (0 - 14) | 0 (0 - 8) |
| % 0 min/week        | 68.5       | 70.7       | 72.7       | 74        |
| Light (min/week)    | 0 (0 - 0)  | 0 (0 - 0)  | 0 (0 - 0)  | 0 (0 - 0) |
| % 0 min/week        | 85.3       | 85.6       | 86         | 86.6      |
| Moderate (min/week) | 0 (0 - 0)  | 0 (0 - 0)  | 0 (0 - 0)  | 0 (0 - 0) |
| % 0 min/week        | 96.4       | 94.8       | 95.8       | 97.6      |
| Vigorous (min/week) | 0 (0 - 0)  | 0 (0 - 0)  | 0 (0 - 0)  | 0 (0 - 0) |
| % 0 min/week        | 79.2       | 82.8       | 83.9       | 84.3      |

Data presented as median (interquartile range), mean  $\pm$  SD or %

Neurologic diseaseAppendix 1.7 Descriptive statistics of participants with a neurologic disease

|                               | Population at T0 | Population at T1 | Population at T2 | Population at T3 |
|-------------------------------|------------------|------------------|------------------|------------------|
| N                             | 188              | 173              | 156              | 145              |
| Age (years)                   | 49.6 ± 12        | 49.7 ± 12.1      | 50.2 ± 11.8      | 51.1 ± 11.5      |
| Sex (% male)                  | 43.6             | 42.8             | 42.9             | 46.9             |
| BMI (kg/m <sup>2</sup> )      | 27 ± 6.6         | 27 ± 6.7         | 26.4 ± 5.8       | 26.2 ± 5.3       |
| Smoking                       |                  |                  |                  |                  |
| % Yes                         | 19.7             | 20.2             | 19.9             | 17.2             |
| % No                          | 67.6             | 68.8             | 69.9             | 72.4             |
| Alcohol use                   |                  |                  |                  |                  |
| % No                          | 53.2             | 53.2             | 57.1             | 55.9             |
| % Light                       | 8                | 8.1              | 7.1              | 8.3              |
| % Moderate                    | 23.9             | 25.4             | 23.1             | 23.4             |
| % Excessive                   | 2.1              | 2.3              | 2.6              | 2.1              |
| Marital status                |                  |                  |                  |                  |
| % Single                      | 30.3             | 31.2             | 31.2             | 31.2             |
| % Married/living with partner | 59.6             | 60.1             | 60.1             | 60.1             |
| Education level               |                  |                  |                  |                  |
| % Low                         | 60.6             | 61.3             | 60.3             | 59.3             |
| % High                        | 29.3             | 30.1             | 30.8             | 31               |
| Work status                   |                  |                  |                  |                  |
| % School                      | 0.5              | 0.6              | 0                | 0.7              |
| % Employed                    | 28.2             | 30.1             | 28.8             | 28.3             |
| % Unemployed                  | 11.7             | 12.7             | 11.5             | 11.7             |
| % Retired                     | 9                | 8.7              | 10.3             | 9.7              |
| % unable to work              | 32.4             | 31.2             | 31.4             | 32.4             |
| % Other                       | 8                | 8.1              | 9                | 7.6              |
| Rehabilitation context        |                  |                  |                  |                  |
| % Rehabilitation center       | 69.7             | 69.9             | 68.6             | 70.3             |
| % Hospital                    | 30.3             | 30.1             | 31.4             | 29.7             |
| Rehabilitation form           |                  |                  |                  |                  |
| % Inpatient                   | 1.1              | 1.2              | 1.3              | 0.7              |
| % Outpatient                  | 93.1             | 93.1             | 92.9             | 94.5             |
| % Consultancy                 | 5.9              | 5.8              | 5.8              | 4.8              |
| Number of counseling moments  |                  |                  |                  |                  |
| % 0                           | 13.3             | 13.9             | 13.5             | 13.1             |
| % 1-3                         | 59               | 59               | 57.1             | 60.7             |
| % 4 or more                   | 27.7             | 27.2             | 29.5             | 26.2             |

Data presented as mean ± SD or %

Note: For some participants information was missing, leading to not all percentages adding up to a 100%.

Appendix 1.8 Physical activity behavior of participants with a neurologic disease

|                     | T0                | T1                | T2                | T3                |
|---------------------|-------------------|-------------------|-------------------|-------------------|
| <b>Total PA</b>     |                   |                   |                   |                   |
| N                   | 188               | 173               | 156               | 145               |
| Total (min/week)    | 1478 (709 - 2268) | 1500 (900 - 2625) | 1770 (840 - 2280) | 1450 (735 - 2280) |
| Light (min/week)    | 870 (311 - 1669)  | 930 (420 - 1890)  | 952 (412 - 1744)  | 840 (360 - 1635)  |
| Moderate (min/week) | 120 (0 - 480)     | 155 (0 - 510)     | 120 (0 - 458)     | 95 (0 - 420)      |
| Vigorous (min/week) | 48 (0 - 210)      | 90 (0 - 210)      | 90 (0 - 281)      | 45 (0 - 210)      |

**Leisure time**

|                                                                    |                 |                 |                 |                 |
|--------------------------------------------------------------------|-----------------|-----------------|-----------------|-----------------|
| N                                                                  | 186             | 171             | 153             | 143             |
| Total (min/week)                                                   | 420 (200 - 686) | 405 (219 - 690) | 450 (218 - 840) | 360 (178 - 600) |
| % 0 min/week                                                       | 5.9             | 2.9             | 3.3             | 6.3             |
| Light (min/week)                                                   | 60 (0 - 225)    | 30 (0 - 270)    | 60 (0 - 330)    | 60 (0 - 270)    |
| % 0 min/week                                                       | 44.1            | 46.8            | 39.9            | 42              |
| Moderate (min/week)                                                | 60 (0 - 210)    | 90 (0 - 240)    | 60 (0 - 225)    | 60 (0 - 140)    |
| % 0 min/week                                                       | 34.4            | 35.1            | 36.6            | 39.9            |
| Vigorous (min/week)                                                | 45 (0 - 180)    | 75 (0 - 198)    | 90 (0 - 240)    | 45 (0 - 180)    |
| % 0 min/week                                                       | 40.9            | 33.3            | 30.7            | 44.1            |
| Frequency of leisure time activities (mean $\pm$ sd days per week) |                 |                 |                 |                 |
| Walking                                                            | 3 $\pm$ 2.8     | 3.2 $\pm$ 2.8   | 3 $\pm$ 2.7     | 2.8 $\pm$ 2.7   |
| Bycycling                                                          | 1.6 $\pm$ 2.1   | 1.6 $\pm$ 2.1   | 1.7 $\pm$ 2.1   | 1.3 $\pm$ 1.9   |
| wheelchair riding                                                  | 0.4 $\pm$ 1.5   | 0.5 $\pm$ 1.6   | 0.6 $\pm$ 1.7   | 0.6 $\pm$ 1.7   |
| Handbiking                                                         | 0 $\pm$ 0.1     | 0.1 $\pm$ 0.5   | 0 $\pm$ 0.3     | 0.1 $\pm$ 0.5   |
| Gardening                                                          | 0.8 $\pm$ 1.5   | 0.6 $\pm$ 1.2   | 0.4 $\pm$ 1     | 0.5 $\pm$ 1.1   |
| Odd jobs                                                           | 0.5 $\pm$ 1.2   | 0.4 $\pm$ 1     | 0.4 $\pm$ 1     | 0.4 $\pm$ 1.1   |
| Fitness                                                            | 0.7 $\pm$ 1.1   | 0.7 $\pm$ 1     | 0.7 $\pm$ 1.2   | 0.5 $\pm$ 0.8   |
| Swimming                                                           | 0.3 $\pm$ 0.6   | 0.3 $\pm$ 0.6   | 0.2 $\pm$ 0.4   | 0.2 $\pm$ 0.5   |

**Household**

|                     |                  |                  |                  |                 |
|---------------------|------------------|------------------|------------------|-----------------|
| N                   | 186              | 171              | 155              | 143             |
| Total (min/week)    | 570 (180 - 1020) | 540 (240 - 1020) | 540 (240 - 1065) | 420 (180 - 988) |
| % 0 min/week        | 13.4             | 12.3             | 11               | 15.4            |
| Light (min/week)    | 540 (180 - 956)  | 480 (232 - 960)  | 480 (232 - 1065) | 420 (165 - 900) |
| % 0 min/week        | 13.4             | 12.3             | 11.6             | 15.4            |
| Moderate (min/week) | 0 (0 - 0)        | 0 (0 - 0)        | 0 (0 - 0)        | 0 (0 - 0)       |
| % 0 min/week        | 87.1             | 87.1             | 83.9             | 90.2            |
| Vigorous (min/week) | 0 (0 - 0)        | 0 (0 - 0)        | 0 (0 - 0)        | 0 (0 - 0)       |
| % 0 min/week        | 100              | 100              | 100              | 100             |

**Work**

|                     |             |             |             |             |
|---------------------|-------------|-------------|-------------|-------------|
| N                   | 175         | 167         | 153         | 145         |
| Total (min/week)    | 0 (0 - 600) | 0 (0 - 750) | 0 (0 - 540) | 0 (0 - 600) |
| % 0 min/week        | 66.3        | 61.7        | 62.1        | 62.8        |
| Light               | 0 (0 - 0)   | 0 (0 - 150) | 0 (0 - 0)   | 0 (0 - 0)   |
| % 0 min/week        | 78.9        | 73.7        | 77.1        | 76.6        |
| Moderate (min/week) | 0 (0 - 0)   | 0 (0 - 0)   | 0 (0 - 0)   | 0 (0 - 0)   |
| % 0 min/week        | 85.1        | 79.6        | 77.8        | 79.3        |
| Vigorous (min/week) | 0 (0 - 0)   | 0 (0 - 0)   | 0 (0 - 0)   | 0 (0 - 0)   |
| % 0 min/week        | 100         | 100         | 100         | 100         |

**Commuting**

|                     |           |           |            |           |
|---------------------|-----------|-----------|------------|-----------|
| N                   | 186       | 173       | 155        | 144       |
| Total (min/week)    | 0 (0 - 0) | 0 (0 - 0) | 0 (0 - 10) | 0 (0 - 0) |
| % 0 min/week        | 80.6      | 80.3      | 74.2       | 75.7      |
| Light (min/week)    | 0 (0 - 0) | 0 (0 - 0) | 0 (0 - 0)  | 0 (0 - 0) |
| % 0 min/week        | 90.9      | 90.8      | 89         | 88.9      |
| Moderate (min/week) | 0 (0 - 0) | 0 (0 - 0) | 0 (0 - 0)  | 0 (0 - 0) |
| % 0 min/week        | 95.7      | 96        | 94.2       | 95.1      |
| Vigorous (min/week) | 0 (0 - 0) | 0 (0 - 0) | 0 (0 - 0)  | 0 (0 - 0) |
| % 0 min/week        | 90.3      | 90.2      | 88.4       | 88.9      |

---

Data presented as median (interquartile range), mean  $\pm$  SD or %



Organ diseaseAppendix 1.9 Descriptive statistics of participants with an organ disease

|                               | Population at T0 | Population at T1 | Population at T2 | Population at T3 |
|-------------------------------|------------------|------------------|------------------|------------------|
| N                             | 152              | 141              | 123              | 107              |
| Age (years)                   | 59.9 ± 10.3      | 60.4 ± 10.1      | 60 ± 10.5        | 61.1 ± 10.9      |
| Sex (% male)                  | 68.4             | 68.8             | 65.9             | 68.2             |
| BMI (kg/m <sup>2</sup> )      | 28.6 ± 4.9       | 28.5 ± 4.9       | 28.4 ± 4.8       | 28.1 ± 4.9       |
| Smoking                       |                  |                  |                  |                  |
| % Yes                         | 13.2             | 13.5             | 13               | 12.1             |
| % No                          | 78.9             | 80.1             | 80.5             | 81.3             |
| Alcohol use                   |                  |                  |                  |                  |
| % No                          | 48               | 48.9             | 49.6             | 46.7             |
| % Light                       | 11.2             | 9.9              | 12.2             | 11.2             |
| % Moderate                    | 30.3             | 31.9             | 29.3             | 33.6             |
| % Excessive                   | 2                | 2.1              | 1.6              | 0.9              |
| Marital status                |                  |                  |                  |                  |
| % Single                      | 25               | 26.2             | 26.2             | 26.2             |
| % Married/living with partner | 69.1             | 68.1             | 68.1             | 68.1             |
| Education level               |                  |                  |                  |                  |
| % Low                         | 76.3             | 76.6             | 75.6             | 76.6             |
| % High                        | 17.1             | 17               | 18.7             | 18.7             |
| Work status                   |                  |                  |                  |                  |
| % School                      | 0.7              | 0.7              | 0.8              | 0.9              |
| % Employed                    | 28.3             | 27.7             | 28.5             | 26.2             |
| % Unemployed                  | 11.8             | 12.1             | 14.6             | 12.1             |
| % Retired                     | 34.2             | 35.5             | 35               | 41.1             |
| % unable to work              | 17.1             | 17               | 13.8             | 13.1             |
| % Other                       | 2.6              | 2.1              | 3.3              | 1.9              |
| Rehabilitation context        |                  |                  |                  |                  |
| % Rehabilitation center       | 82.2             | 83               | 84.6             | 86               |
| % Hospital                    | 17.8             | 17               | 15.4             | 14               |
| Rehabilitation form           |                  |                  |                  |                  |
| % Inpatient                   | 2                | 2.1              | 1.6              | 1.9              |
| % Outpatient                  | 90.1             | 90.1             | 88.6             | 89.7             |
| % Consultancy                 | 7.9              | 7.8              | 9.8              | 8.4              |
| Number of counseling moments  |                  |                  |                  |                  |
| % 0                           | 10.5             | 9.9              | 10.6             | 10.3             |
| % 1-3                         | 61.8             | 61.7             | 63.4             | 60.7             |
| % 4 or more                   | 27.6             | 28.4             | 26               | 29               |

Data presented as mean ± SD or %

Note: For some participants information was missing, leading to not all percentages adding up to a 100%.

Appendix 1.10 Physical activity behavior of participants with an organ disease

|                     | T0                | T1                | T2                | T3                |
|---------------------|-------------------|-------------------|-------------------|-------------------|
| <b>Total PA</b>     |                   |                   |                   |                   |
| N                   | 152               | 141               | 123               | 107               |
| Total (min/week)    | 1500 (840 - 2370) | 1560 (870 - 2775) | 1950 (870 - 3112) | 1740 (904 - 3112) |
| Light (min/week)    | 600 (180 - 1489)  | 600 (180 - 1260)  | 600 (211 - 1770)  | 600 (165 - 1260)  |
| Moderate (min/week) | 300 (0 - 795)     | 390 (90 - 1080)   | 420 (60 - 1150)   | 385 (60 - 1042)   |
| Vigorous (min/week) | 120 (0 - 270)     | 180 (0 - 360)     | 124 (0 - 360)     | 180 (0 - 385)     |

**Leisure time**

|                                                                    |                 |                 |                 |                 |
|--------------------------------------------------------------------|-----------------|-----------------|-----------------|-----------------|
| N                                                                  | 152             | 139             | 120             | 105             |
| Total (min/week)                                                   | 505 (224 - 848) | 605 (300 - 990) | 570 (326 - 960) | 690 (360 - 990) |
| % 0 min/week                                                       | 2               | 2.2             | 2.5             | 5.7             |
| Light (min/week)                                                   | 0 (0 - 120)     | 0 (0 - 45)      | 0 (0 - 120)     | 0 (0 - 0)       |
| % 0 min/week                                                       | 67.8            | 71.2            | 67.5            | 77.1            |
| Moderate (min/week)                                                | 180 (0 - 450)   | 180 (20 - 480)  | 180 (0 - 480)   | 240 (30 - 615)  |
| % 0 min/week                                                       | 31.6            | 23.7            | 26.7            | 24.8            |
| Vigorous (min/week)                                                | 120 (0 - 270)   | 140 (0 - 352)   | 120 (0 - 300)   | 180 (20 - 360)  |
| % 0 min/week                                                       | 27.6            | 26.6            | 30              | 24.8            |
| Frequency of leisure time activities (mean $\pm$ sd days per week) |                 |                 |                 |                 |
| Walking                                                            | 3.7 $\pm$ 2.6   | 3.5 $\pm$ 2.5   | 3.4 $\pm$ 2.6   | 3.7 $\pm$ 2.6   |
| Bycycling                                                          | 1.7 $\pm$ 2.1   | 1.5 $\pm$ 1.9   | 1.5 $\pm$ 1.9   | 1.9 $\pm$ 2.1   |
| wheelchair riding                                                  | 0.1 $\pm$ 0.7   | 0.1 $\pm$ 0.6   | 0.1 $\pm$ 0.9   | 0.1 $\pm$ 1     |
| Handbiking                                                         | 0 $\pm$ 0.1     | 0 $\pm$ 0       | 0 $\pm$ 0       | 0 $\pm$ 0       |
| Gardening                                                          | 0.9 $\pm$ 1.4   | 0.7 $\pm$ 1.4   | 0.7 $\pm$ 1     | 0.7 $\pm$ 1.2   |
| Odd jobs                                                           | 0.9 $\pm$ 1.5   | 0.7 $\pm$ 1.5   | 0.8 $\pm$ 1.3   | 0.9 $\pm$ 1.6   |
| Fitness                                                            | 0               | 0.7 $\pm$ 1.1   | 0.4 $\pm$ 0.8   | 0.4 $\pm$ 1     |
| Swimming                                                           | 0.2 $\pm$ 0.5   | 0.1 $\pm$ 0.4   | 0.1 $\pm$ 0.4   | 0.1 $\pm$ 0.5   |

**Household**

|                     |                 |                 |                  |                  |
|---------------------|-----------------|-----------------|------------------|------------------|
| N                   | 147             | 138             | 121              | 106              |
| Total (min/week)    | 455 (142 - 930) | 540 (169 - 960) | 525 (240 - 1080) | 525 (180 - 1005) |
| % 0 min/week        | 15.6            | 14.5            | 12.4             | 15.1             |
| Light (min/week)    | 420 (128 - 840) | 465 (150 - 840) | 420 (150 - 900)  | 435 (139 - 840)  |
| % 0 min/week        | 17.7            | 15.2            | 14.9             | 15.1             |
| Moderate (min/week) | 0 (0 - 0)       | 0 (0 - 60)      | 0 (0 - 60)       | 0 (0 - 84)       |
| % 0 min/week        | 75.5            | 63              | 63.6             | 59.4             |
| Vigorous (min/week) | 0 (0 - 0)       | 0 (0 - 0)       | 0 (0 - 0)        | 0 (0 - 0)        |
| % 0 min/week        | 100             | 100             | 100              | 100              |

**Work**

|                     |             |             |             |             |
|---------------------|-------------|-------------|-------------|-------------|
| N                   | 142         | 137         | 120         | 102         |
| Total (min/week)    | 0 (0 - 480) | 0 (0 - 480) | 0 (0 - 765) | 0 (0 - 705) |
| % 0 min/week        | 65.5        | 59.9        | 60.8        | 61.8        |
| Light               | 0 (0 - 0)   | 0 (0 - 0)   | 0 (0 - 0)   | 0 (0 - 0)   |
| % 0 min/week        | 84.5        | 84.7        | 84.2        | 85.3        |
| Moderate (min/week) | 0 (0 - 0)   | 0 (0 - 300) | 0 (0 - 120) | 0 (0 - 120) |
| % 0 min/week        | 78.2        | 67.9        | 70          | 71.6        |
| Vigorous (min/week) | 0 (0 - 0)   | 0 (0 - 0)   | 0 (0 - 0)   | 0 (0 - 0)   |
| % 0 min/week        | 100         | 100         | 100         | 100         |

**Commuting**

|                     |           |           |           |           |
|---------------------|-----------|-----------|-----------|-----------|
| N                   | 148       | 141       | 122       | 102       |
| Total (min/week)    | 0 (0 - 0) | 0 (0 - 8) | 0 (0 - 0) | 0 (0 - 0) |
| % 0 min/week        | 78.4      | 74.5      | 78.7      | 75.5      |
| Light (min/week)    | 0 (0 - 0) | 0 (0 - 0) | 0 (0 - 0) | 0 (0 - 0) |
| % 0 min/week        | 93.2      | 94.3      | 94.3      | 94.1      |
| Moderate (min/week) | 0 (0 - 0) | 0 (0 - 0) | 0 (0 - 0) | 0 (0 - 0) |
| % 0 min/week        | 94.6      | 89.4      | 91.8      | 92.2      |
| Vigorous (min/week) | 0 (0 - 0) | 0 (0 - 0) | 0 (0 - 0) | 0 (0 - 0) |
| % 0 min/week        | 85.8      | 85.8      | 86.9      | 86.3      |

Data presented as median (interquartile range), mean  $\pm$  SD or %

AmputationAppendix 1.11 Descriptive statistics of participants with an amputation

|                               | Population at T0 | Population at T1 | Population at T2 | Population at T3 |
|-------------------------------|------------------|------------------|------------------|------------------|
| N                             | 57               | 52               | 47               | 40               |
| Age (years)                   | 56.8 ± 12.6      | 56.6 ± 13        | 55.9 ± 13.3      | 57.4 ± 12.2      |
| Sex (% male)                  | 77.2             | 78.8             | 76.6             | 82.5             |
| BMI (kg/m <sup>2</sup> )      | 27.1 ± 5.9       | 26.7 ± 5.8       | 26.7 ± 5.8       | 27.3 ± 6.1       |
| Smoking                       |                  |                  |                  |                  |
| % Yes                         | 22.8             | 21.2             | 19.1             | 25               |
| % No                          | 70.2             | 73.1             | 76.6             | 72.5             |
| Alcohol use                   |                  |                  |                  |                  |
| % No                          | 59.6             | 59.6             | 59.6             | 62.5             |
| % Light                       | 5.3              | 5.8              | 6.4              | 2.5              |
| % Moderate                    | 21.1             | 21.2             | 23.4             | 25               |
| % Excessive                   | 7                | 7.7              | 6.4              | 7.5              |
| Marital status                |                  |                  |                  |                  |
| % Single                      | 31.6             | 32.7             | 32.7             | 32.7             |
| % Married/living with partner | 61.4             | 61.5             | 61.5             | 61.5             |
| Education level               |                  |                  |                  |                  |
| % Low                         | 77.2             | 76.9             | 80.9             | 82.5             |
| % High                        | 14               | 15.4             | 12.8             | 12.5             |
| Work status                   |                  |                  |                  |                  |
| % School                      | 0                | 0                | 0                | 0                |
| % Employed                    | 19.3             | 19.2             | 23.4             | 20               |
| % Unemployed                  | 8.8              | 7.7              | 10.6             | 7.5              |
| % Retired                     | 31.6             | 30.8             | 29.8             | 30               |
| % unable to work              | 28.1             | 30.8             | 25.5             | 32.5             |
| % Other                       | 3.5              | 3.8              | 4.3              | 5                |
| Rehabilitation context        |                  |                  |                  |                  |
| % Rehabilitation center       | 71.9             | 71.2             | 68.1             | 70               |
| % Hospital                    | 28.1             | 28.8             | 31.9             | 30               |
| Rehabilitation form           |                  |                  |                  |                  |
| % Inpatient                   | 7                | 5.8              | 8.5              | 7.5              |
| % Outpatient                  | 87.7             | 88.5             | 85.1             | 85               |
| % Consultancy                 | 5.3              | 5.8              | 6.4              | 7.5              |
| Number of counseling moments  |                  |                  |                  |                  |
| % 0                           | 17.5             | 19.2             | 19.1             | 20               |
| % 1-3                         | 42.1             | 42.3             | 40.4             | 45               |
| % 4 or more                   | 40.4             | 38.5             | 40.4             | 35               |

Data presented as mean ± SD or %

Note: For some participants information was missing, leading to not all percentages adding up to a 100%.

Appendix 1.12 Physical activity behavior of participants with an amputation

|                     | T0                | T1                 | T2                 | T3                 |
|---------------------|-------------------|--------------------|--------------------|--------------------|
| <b>Total PA</b>     |                   |                    |                    |                    |
| N                   | 57                | 52                 | 47                 | 40                 |
| Total (min/week)    | 1294 (615 - 2130) | 1942 (1260 - 2565) | 1920 (1276 - 2925) | 1918 (1130 - 2925) |
| Light (min/week)    | 840 (360 - 1680)  | 1238 (702 - 1732)  | 1200 (420 - 2070)  | 840 (420 - 1680)   |
| Moderate (min/week) | 210 (0 - 420)     | 190 (60 - 600)     | 210 (19 - 840)     | 330 (60 - 855)     |
| Vigorous (min/week) | 30 (0 - 180)      | 30 (0 - 278)       | 45 (0 - 240)       | 60 (0 - 278)       |

**Leisure time**

|                                                                    |                  |                  |                  |                  |
|--------------------------------------------------------------------|------------------|------------------|------------------|------------------|
| <b>N</b>                                                           | 56               | 51               | 47               | 39               |
| Total (min/week)                                                   | 745 (311 - 1215) | 690 (415 - 1290) | 585 (262 - 1200) | 660 (420 - 1122) |
| % 0 min/week                                                       | 7.1              | 3.9              | 10.6             | 2.6              |
| Light (min/week)                                                   | 88 (0 - 725)     | 180 (0 - 540)    | 60 (0 - 420)     | 90 (0 - 472)     |
| % 0 min/week                                                       | 48.2             | 35.3             | 44.7             | 43.6             |
| Moderate (min/week)                                                | 139 (0 - 375)    | 180 (0 - 450)    | 120 (0 - 480)    | 90 (0 - 480)     |
| % 0 min/week                                                       | 39.3             | 27.5             | 34               | 30.8             |
| Vigorous (min/week)                                                | 30 (0 - 184)     | 30 (0 - 255)     | 30 (0 - 240)     | 60 (0 - 270)     |
| % 0 min/week                                                       | 46.4             | 47.1             | 46.8             | 46.2             |
| Frequency of leisure time activities (mean $\pm$ sd days per week) |                  |                  |                  |                  |
| Walking                                                            | 2.9 $\pm$ 3.1    | 2.9 $\pm$ 3      | 2.7 $\pm$ 2.8    | 3 $\pm$ 3        |
| Bycycling                                                          | 0.7 $\pm$ 1.8    | 0.7 $\pm$ 1.6    | 0.8 $\pm$ 1.7    | 0.7 $\pm$ 1.6    |
| wheelchair riding                                                  | 2.8 $\pm$ 3.3    | 2.2 $\pm$ 3.1    | 1.9 $\pm$ 2.9    | 2.3 $\pm$ 3.2    |
| Handbiking                                                         | 0.2 $\pm$ 0.8    | 0.4 $\pm$ 1.3    | 0.4 $\pm$ 1.1    | 0.3 $\pm$ 0.9    |
| Gardening                                                          | 0.5 $\pm$ 1.3    | 0.5 $\pm$ 0.9    | 0.5 $\pm$ 1.1    | 0.7 $\pm$ 1.4    |
| Odd jobs                                                           | 0.7 $\pm$ 1.6    | 0.9 $\pm$ 1.6    | 0.7 $\pm$ 1.3    | 1.1 $\pm$ 1.8    |
| Fitness                                                            | 0.8 $\pm$ 1.2    | 0.8 $\pm$ 1.4    | 0.5 $\pm$ 1      | 0.5 $\pm$ 0.9    |
| Swimming                                                           | 0.5 $\pm$ 0.9    | 0.3 $\pm$ 0.5    | 0.2 $\pm$ 0.5    | 0.2 $\pm$ 0.4    |

**Household**

|                     |               |                 |                  |                 |
|---------------------|---------------|-----------------|------------------|-----------------|
| <b>N</b>            | 54            | 52              | 47               | 40              |
| Total (min/week)    | 225 (0 - 652) | 485 (202 - 840) | 650 (225 - 1050) | 420 (105 - 840) |
| % 0 min/week        | 29.6          | 19.2            | 21.3             | 22.5            |
| Light (min/week)    | 225 (0 - 630) | 485 (188 - 840) | 630 (225 - 1005) | 390 (105 - 840) |
| % 0 min/week        | 29.6          | 19.2            | 21.3             | 22.5            |
| Moderate (min/week) | 0 (0 - 0)     | 0 (0 - 0)       | 0 (0 - 1)        | 0 (0 - 0)       |
| % 0 min/week        | 90.7          | 86.5            | 74.5             | 82.5            |
| Vigorous (min/week) | 0 (0 - 0)     | 0 (0 - 0)       | 0 (0 - 0)        | 0 (0 - 0)       |
| % 0 min/week        | 100           | 100             | 100              | 100             |

**Work**

|                     |           |             |             |             |
|---------------------|-----------|-------------|-------------|-------------|
| <b>N</b>            | 53        | 49          | 46          | 38          |
| Total (min/week)    | 0 (0 - 0) | 0 (0 - 540) | 0 (0 - 315) | 0 (0 - 660) |
| % 0 min/week        | 75.5      | 59.2        | 69.6        | 52.6        |
| Light               | 0 (0 - 0) | 0 (0 - 240) | 0 (0 - 0)   | 0 (0 - 315) |
| % 0 min/week        | 84.9      | 73.5        | 82.6        | 73.7        |
| Moderate (min/week) | 0 (0 - 0) | 0 (0 - 0)   | 0 (0 - 0)   | 0 (0 - 150) |
| % 0 min/week        | 84.9      | 77.6        | 76.1        | 65.8        |
| Vigorous (min/week) | 0 (0 - 0) | 0 (0 - 0)   | 0 (0 - 0)   | 0 (0 - 0)   |
| % 0 min/week        | 100       | 100         | 100         | 100         |

**Commuting**

|                     |           |           |           |           |
|---------------------|-----------|-----------|-----------|-----------|
| <b>N</b>            | 57        | 52        | 47        | 39        |
| Total (min/week)    | 0 (0 - 0) | 0 (0 - 1) | 0 (0 - 0) | 0 (0 - 0) |
| % 0 min/week        | 87.7      | 75        | 85.1      | 76.9      |
| Light (min/week)    | 0 (0 - 0) | 0 (0 - 0) | 0 (0 - 0) | 0 (0 - 0) |
| % 0 min/week        | 91.2      | 90.4      | 89.4      | 89.7      |
| Moderate (min/week) | 0 (0 - 0) | 0 (0 - 0) | 0 (0 - 0) | 0 (0 - 0) |
| % 0 min/week        | 96.5      | 86.5      | 95.7      | 87.2      |
| Vigorous (min/week) | 0 (0 - 0) | 0 (0 - 0) | 0 (0 - 0) | 0 (0 - 0) |
| % 0 min/week        | 100       | 96.2      | 93.6      | 92.3      |

Data presented as median (interquartile range), mean  $\pm$  SD or %

Spinal cord injuryAppendix 1.13 Descriptive statistics of participants with SCI

|                               | Population at T0 | Population at T1 | Population at T2 | Population at T3 |
|-------------------------------|------------------|------------------|------------------|------------------|
| N                             | 38               | 30               | 27               | 24               |
| Age (years)                   | 48.2 ± 15.4      | 48.2 ± 15.6      | 49.4 ± 14.2      | 50 ± 16.2        |
| Sex (% male)                  | 42.1             | 36.7             | 44.4             | 45.8             |
| BMI (kg/m <sup>2</sup> )      | 31 ± 23.8        | 32.4 ± 26.3      | 31.8 ± 28.3      | 31.5 ± 29.6      |
| Smoking                       |                  |                  |                  |                  |
| % Yes                         | 18.4             | 20               | 14.8             | 16.7             |
| % No                          | 68.4             | 73.3             | 74.1             | 75               |
| Alcohol use                   |                  |                  |                  |                  |
| % No                          | 42.1             | 43.3             | 44.4             | 41.7             |
| % Light                       | 2.6              | 3.3              | 3.7              | 0                |
| % Moderate                    | 34.2             | 36.7             | 33.3             | 41.7             |
| % Excessive                   | 7.9              | 10               | 7.4              | 8.3              |
| Marital status                |                  |                  |                  |                  |
| % Single                      | 44.7             | 43.3             | 43.3             | 43.3             |
| % Married/living with partner | 50               | 53.3             | 53.3             | 53.3             |
| Education level               |                  |                  |                  |                  |
| % Low                         | 60.5             | 56.7             | 55.6             | 66.7             |
| % High                        | 34.2             | 40               | 37               | 29.2             |
| Work status                   |                  |                  |                  |                  |
| % School                      | 5.3              | 3.3              | 3.7              | 8.3              |
| % Employed                    | 26.3             | 26.7             | 25.9             | 16.7             |
| % Unemployed                  | 10.5             | 10               | 11.1             | 8.3              |
| % Retired                     | 18.4             | 20               | 18.5             | 25               |
| % unable to work              | 26.3             | 26.7             | 25.9             | 29.2             |
| % Other                       | 7.9              | 10               | 7.4              | 8.3              |
| Rehabilitation context        |                  |                  |                  |                  |
| % Rehabilitation center       | 89.5             | 86.7             | 88.9             | 91.7             |
| % Hospital                    | 10.5             | 13.3             | 11.1             | 8.3              |
| Rehabilitation form           |                  |                  |                  |                  |
| % Inpatient                   | 13.2             | 6.7              | 11.1             | 16.7             |
| % Outpatient                  | 73.7             | 76.7             | 70.4             | 66.7             |
| % Consultancy                 | 13.2             | 16.7             | 18.5             | 16.7             |
| Number of counseling moments  |                  |                  |                  |                  |
| % 0                           | 2.6              | 0                | 0                | 4.2              |
| % 1-3                         | 71.1             | 73.3             | 70.4             | 66.7             |
| % 4 or more                   | 26.3             | 26.7             | 29.6             | 29.2             |

Data presented as mean ± SD or %

Note: For some participants information was missing, leading to not all percentages adding up to a 100%.

Appendix 1.14 Physical activity behavior of participants with SCI

|                     | T0                | T1                | T2                | T3                 |
|---------------------|-------------------|-------------------|-------------------|--------------------|
| <b>Total PA</b>     |                   |                   |                   |                    |
| N                   | 38                | 30                | 27                | 24                 |
| Total (min/week)    | 1515 (885 - 2059) | 2018 (915 - 3008) | 2100 (924 - 2599) | 1700 (1061 - 2599) |
| Light (min/week)    | 885 (555 - 1582)  | 1185 (555 - 1642) | 1185 (720 - 2115) | 1203 (390 - 1779)  |
| Moderate (min/week) | 52 (0 - 240)      | 142 (0 - 465)     | 30 (0 - 225)      | 150 (0 - 484)      |
| Vigorous (min/week) | 42 (0 - 195)      | 120 (0 - 377)     | 90 (0 - 270)      | 120 (0 - 210)      |

**Leisure time**

|                                                                    |                 |                  |                 |                 |
|--------------------------------------------------------------------|-----------------|------------------|-----------------|-----------------|
| N                                                                  | 38              | 30               | 26              | 23              |
| Total (min/week)                                                   | 435 (188 - 825) | 604 (398 - 1155) | 540 (375 - 862) | 495 (370 - 955) |
| % 0 min/week                                                       | 5.3             | 3.3              | 3.8             | 8.7             |
| Light (min/week)                                                   | 135 (0 - 442)   | 240 (0 - 555)    | 195 (1 - 465)   | 60 (0 - 375)    |
| % 0 min/week                                                       | 36.8            | 36.7             | 26.9            | 39.1            |
| Moderate (min/week)                                                | 52 (0 - 240)    | 128 (0 - 285)    | 0 (0 - 232)     | 90 (0 - 321)    |
| % 0 min/week                                                       | 34.2            | 33.3             | 53.8            | 39.1            |
| Vigorous (min/week)                                                | 42 (0 - 195)    | 120 (0 - 311)    | 75 (0 - 225)    | 120 (0 - 210)   |
| % 0 min/week                                                       | 44.7            | 33.3             | 30.8            | 30.4            |
| Frequency of leisure time activities (mean $\pm$ sd days per week) |                 |                  |                 |                 |
| Walking                                                            | 2.1 $\pm$ 2.6   | 2.2 $\pm$ 2.6    | 1.5 $\pm$ 2.1   | 2 $\pm$ 2.5     |
| Bycycling                                                          | 1.2 $\pm$ 2.1   | 1.6 $\pm$ 2.4    | 0.8 $\pm$ 1.8   | 1.6 $\pm$ 2.6   |
| wheelchair riding                                                  | 1.6 $\pm$ 2.6   | 1.7 $\pm$ 2.9    | 2.6 $\pm$ 3.4   | 2.5 $\pm$ 3.3   |
| Handbiking                                                         | 0.3 $\pm$ 1.3   | 0.3 $\pm$ 0.9    | 0.7 $\pm$ 1.4   | 0.4 $\pm$ 1.2   |
| Gardening                                                          | 0.4 $\pm$ 0.9   | 0.2 $\pm$ 0.5    | 0.2 $\pm$ 0.5   | 0.3 $\pm$ 0.7   |
| Odd jobs                                                           | 0.8 $\pm$ 1.6   | 0.4 $\pm$ 1      | 0.3 $\pm$ 0.6   | 0.7 $\pm$ 1.3   |
| Fitness                                                            | 0               | 0.7 $\pm$ 0.8    | 0.5 $\pm$ 0.9   | 0.6 $\pm$ 1     |
| Swimming                                                           | 0.5 $\pm$ 0.8   | 0.4 $\pm$ 0.8    | 0.2 $\pm$ 0.5   | 0.2 $\pm$ 0.5   |

**Household**

|                     |                |                 |                  |                 |
|---------------------|----------------|-----------------|------------------|-----------------|
| N                   | 38             | 30              | 27               | 22              |
| Total (min/week)    | 450 (38 - 840) | 510 (135 - 998) | 360 (180 - 1125) | 322 (120 - 630) |
| % 0 min/week        | 21.1           | 13.3            | 11.1             | 13.6            |
| Light (min/week)    | 450 (38 - 840) | 510 (135 - 998) | 360 (180 - 880)  | 278 (120 - 604) |
| % 0 min/week        | 21.1           | 13.3            | 11.1             | 13.6            |
| Moderate (min/week) | 0 (0 - 0)      | 0 (0 - 0)       | 0 (0 - 0)        | 0 (0 - 0)       |
| % 0 min/week        | 97.4           | 86.7            | 92.6             | 86.4            |
| Vigorous (min/week) | 0 (0 - 0)      | 0 (0 - 0)       | 0 (0 - 0)        | 0 (0 - 0)       |
| % 0 min/week        | 100            | 100             | 100              | 100             |

**Work**

|                     |             |             |               |              |
|---------------------|-------------|-------------|---------------|--------------|
| N                   | 36          | 30          | 27            | 23           |
| Total (min/week)    | 0 (0 - 495) | 0 (0 - 720) | 180 (0 - 930) | 0 (0 - 1110) |
| % 0 min/week        | 61.1        | 53.3        | 48.1          | 56.5         |
| Light               | 0 (0 - 300) | 0 (0 - 360) | 0 (0 - 810)   | 0 (0 - 840)  |
| % 0 min/week        | 69.4        | 70          | 55.6          | 65.2         |
| Moderate (min/week) | 0 (0 - 0)   | 0 (0 - 0)   | 0 (0 - 0)     | 0 (0 - 0)    |
| % 0 min/week        | 86.1        | 83.3        | 88.9          | 82.6         |
| Vigorous (min/week) | 0 (0 - 0)   | 0 (0 - 0)   | 0 (0 - 0)     | 0 (0 - 0)    |
| % 0 min/week        | 100         | 100         | 100           | 100          |

**Commuting**

|                     |            |            |            |           |
|---------------------|------------|------------|------------|-----------|
| N                   | 38         | 30         | 27         | 24        |
| Total (min/week)    | 0 (0 - 90) | 0 (0 - 71) | 0 (0 - 52) | 0 (0 - 0) |
| % 0 min/week        | 63.2       | 70         | 66.7       | 79.2      |
| Light (min/week)    | 0 (0 - 22) | 0 (0 - 0)  | 0 (0 - 0)  | 0 (0 - 0) |
| % 0 min/week        | 73.7       | 86.7       | 92.6       | 91.7      |
| Moderate (min/week) | 0 (0 - 0)  | 0 (0 - 0)  | 0 (0 - 0)  | 0 (0 - 0) |
| % 0 min/week        | 92.1       | 90         | 81.5       | 100       |
| Vigorous (min/week) | 0 (0 - 0)  | 0 (0 - 0)  | 0 (0 - 0)  | 0 (0 - 0) |
| % 0 min/week        | 94.7       | 90         | 85.2       | 87.5      |

Data presented as median (interquartile range), mean  $\pm$  SD or %

Other diseasesAppendix 1.15 Descriptive statistics of participants with other diseases

|                               | Population at T0 | Population at T1 | Population at T2 | Population at T3 |
|-------------------------------|------------------|------------------|------------------|------------------|
| N                             | 48               | 42               | 43               | 31               |
| Age (years)                   | 46.4 ± 13.8      | 47.4 ± 14.1      | 46.4 ± 13.9      | 46.9 ± 14.9      |
| Sex (% male)                  | 47.9             | 47.6             | 51.2             | 45.2             |
| BMI (kg/m <sup>2</sup> )      | 26 ± 4.6         | 25.7 ± 4.4       | 26.1 ± 4.6       | 26.8 ± 5         |
| Smoking                       |                  |                  |                  |                  |
| % Yes                         | 10.4             | 9.5              | 11.6             | 6.5              |
| % No                          | 72.9             | 81               | 72.1             | 77.4             |
| Alcohol use                   |                  |                  |                  |                  |
| % No                          | 35.4             | 40.5             | 34.9             | 35.5             |
| % Light                       | 18.8             | 19               | 20.9             | 22.6             |
| % Moderate                    | 27.1             | 28.6             | 25.6             | 22.6             |
| % Excessive                   | 2.1              | 2.4              | 2.3              | 3.2              |
| Marital status                |                  |                  |                  |                  |
| % Single                      | 14.6             | 16.7             | 16.7             | 16.7             |
| % Married/living with partner | 75               | 78.6             | 78.6             | 78.6             |
| Education level               |                  |                  |                  |                  |
| % Low                         | 62.5             | 64.3             | 69.8             | 71               |
| % High                        | 25               | 28.6             | 20.9             | 22.6             |
| Work status                   |                  |                  |                  |                  |
| % School                      | 6.2              | 7.1              | 7                | 9.7              |
| % Employed                    | 39.6             | 40.5             | 41.9             | 41.9             |
| % Unemployed                  | 4.2              | 2.4              | 4.7              | 6.5              |
| % Retired                     | 12.5             | 14.3             | 11.6             | 12.9             |
| % unable to work              | 20.8             | 23.8             | 18.6             | 16.1             |
| % Other                       | 6.2              | 7.1              | 7                | 6.5              |
| Rehabilitation context        |                  |                  |                  |                  |
| % Rehabilitation center       | 62.5             | 66.7             | 60.5             | 61.3             |
| % Hospital                    | 37.5             | 33.3             | 39.5             | 38.7             |
| Rehabilitation form           |                  |                  |                  |                  |
| % Inpatient                   | 0                | 0                | 0                | 0                |
| % Outpatient                  | 93.8             | 92.9             | 95.3             | 93.5             |
| % Consultancy                 | 6.2              | 7.1              | 4.7              | 6.5              |
| Number of counseling moments  |                  |                  |                  |                  |
| % 0                           | 4.2              | 2.4              | 2.3              | 6.5              |
| % 1-3                         | 52.1             | 50               | 55.8             | 51.6             |
| % 4 or more                   | 43.8             | 47.6             | 41.9             | 41.9             |

Data presented as mean ± SD or %

Note: For some participants information was missing, leading to not all percentages adding up to a 100%.

Appendix 1.16 Physical activity behavior of participants with other diseases

|                     | T0                 | T1                 | T2                 | T3                 |
|---------------------|--------------------|--------------------|--------------------|--------------------|
| <b>Total PA</b>     |                    |                    |                    |                    |
| N                   | 48                 | 42                 | 43                 | 31                 |
| Total (min/week)    | 1996 (1282 - 2535) | 1715 (1402 - 3205) | 2050 (1380 - 2960) | 2135 (1560 - 2960) |
| Light (min/week)    | 1305 (652 - 2018)  | 1260 (562 - 2205)  | 1265 (731 - 2160)  | 1320 (530 - 2075)  |
| Moderate (min/week) | 132 (0 - 615)      | 172 (8 - 788)      | 240 (0 - 690)      | 180 (68 - 780)     |
| Vigorous (min/week) | 60 (0 - 188)       | 125 (40 - 251)     | 60 (0 - 205)       | 100 (60 - 240)     |

**Leisure time**

|                                                                    |                 |                 |                 |                 |
|--------------------------------------------------------------------|-----------------|-----------------|-----------------|-----------------|
| N                                                                  | 48              | 42              | 42              | 31              |
| Total (min/week)                                                   | 415 (216 - 735) | 405 (285 - 889) | 412 (259 - 630) | 450 (312 - 810) |
| % 0 min/week                                                       | 2.1             | 2.4             | 2.4             | 3.2             |
| Light (min/week)                                                   | 120 (0 - 315)   | 90 (0 - 288)    | 120 (0 - 348)   | 120 (0 - 300)   |
| % 0 min/week                                                       | 27.1            | 38.1            | 31              | 32.3            |
| Moderate (min/week)                                                | 60 (0 - 225)    | 30 (0 - 285)    | 60 (0 - 202)    | 105 (0 - 352)   |
| % 0 min/week                                                       | 41.7            | 42.9            | 40.5            | 35.5            |
| Vigorous (min/week)                                                | 60 (0 - 180)    | 120 (40 - 232)  | 60 (0 - 172)    | 75 (22 - 150)   |
| % 0 min/week                                                       | 33.3            | 23.8            | 35.7            | 22.6            |
| Frequency of leisure time activities (mean $\pm$ sd days per week) |                 |                 |                 |                 |
| Walking                                                            | 3.9 $\pm$ 2.6   | 3.9 $\pm$ 2.7   | 3.7 $\pm$ 2.6   | 3.9 $\pm$ 2.7   |
| Bycycling                                                          | 1.8 $\pm$ 2     | 1.7 $\pm$ 1.8   | 1.2 $\pm$ 1.9   | 1.6 $\pm$ 1.7   |
| wheelchair riding                                                  | 0 $\pm$ 0       | 0 $\pm$ 0.3     | 0.1 $\pm$ 0.8   | 0 $\pm$ 0       |
| Handbiking                                                         | 0 $\pm$ 0.1     | 0 $\pm$ 0       | 0 $\pm$ 0       | 0 $\pm$ 0       |
| Gardening                                                          | 1 $\pm$ 1.5     | 0.8 $\pm$ 1.5   | 0.5 $\pm$ 0.8   | 1.3 $\pm$ 1.9   |
| Odd jobs                                                           | 0.7 $\pm$ 1.4   | 0.6 $\pm$ 1.1   | 0.4 $\pm$ 0.8   | 0.7 $\pm$ 1.3   |

**Household**

|                     |                  |                 |                  |                 |
|---------------------|------------------|-----------------|------------------|-----------------|
| N                   | 48               | 42              | 43               | 31              |
| Total (min/week)    | 740 (349 - 1060) | 515 (188 - 982) | 802 (480 - 1050) | 720 (390 - 915) |
| % 0 min/week        | 6.2              | 7.1             | 2.3              | 6.5             |
| Light (min/week)    | 660 (349 - 1028) | 510 (188 - 945) | 742 (420 - 960)  | 720 (360 - 915) |
| % 0 min/week        | 6.2              | 7.1             | 2.3              | 6.5             |
| Moderate (min/week) | 0 (0 - 0)        | 0 (0 - 0)       | 0 (0 - 0)        | 0 (0 - 0)       |
| % 0 min/week        | 81.2             | 85.7            | 83.7             | 77.4            |
| Vigorous (min/week) | 0 (0 - 0)        | 0 (0 - 0)       | 0 (0 - 0)        | 0 (0 - 0)       |
| % 0 min/week        | 100              | 100             | 100              | 100             |

**Work**

|                     |               |                |                |                |
|---------------------|---------------|----------------|----------------|----------------|
| N                   | 46            | 42             | 43             | 31             |
| Total (min/week)    | 240 (0 - 810) | 660 (0 - 1245) | 480 (0 - 1440) | 360 (0 - 1440) |
| % 0 min/week        | 43.5          | 33.3           | 37.2           | 41.9           |
| Light               | 0 (0 - 450)   | 120 (0 - 900)  | 0 (0 - 690)    | 0 (0 - 840)    |
| % 0 min/week        | 58.7          | 50             | 58.1           | 58.1           |
| Moderate (min/week) | 0 (0 - 105)   | 0 (0 - 285)    | 0 (0 - 450)    | 0 (0 - 150)    |
| % 0 min/week        | 71.7          | 61.9           | 65.1           | 71             |
| Vigorous (min/week) | 0 (0 - 0)     | 0 (0 - 0)      | 0 (0 - 0)      | 0 (0 - 0)      |
| % 0 min/week        | 100           | 100            | 100            | 100            |

**Commuting**

|                     |            |            |            |             |
|---------------------|------------|------------|------------|-------------|
| N                   | 48         | 42         | 43         | 31          |
| Total (min/week)    | 0 (0 - 45) | 0 (0 - 79) | 0 (0 - 60) | 0 (0 - 110) |
| % 0 min/week        | 64.6       | 57.1       | 65.1       | 54.8        |
| Light (min/week)    | 0 (0 - 0)  | 0 (0 - 0)  | 0 (0 - 0)  | 0 (0 - 0)   |
| % 0 min/week        | 83.3       | 88.1       | 86         | 83.9        |
| Moderate (min/week) | 0 (0 - 0)  | 0 (0 - 0)  | 0 (0 - 0)  | 0 (0 - 0)   |
| % 0 min/week        | 97.9       | 90.5       | 95.3       | 93.5        |
| Vigorous (min/week) | 0 (0 - 0)  | 0 (0 - 22) | 0 (0 - 0)  | 0 (0 - 25)  |
| % 0 min/week        | 77.1       | 73.8       | 79.1       | 71          |

Data presented as median (interquartile range), mean  $\pm$  SD or %
